# Hydrogen Sulfide Protects against Chemical Hypoxia-Induced Cytotoxicity and Inflammation in HaCaT Cells through Inhibition of ROS/NF- $\kappa$ B/COX-2 Pathway

Chuntao Yang<sup>1</sup>\*, Zhanli Yang<sup>1</sup>\*, Meifen Zhang<sup>2</sup>\*, Qi Dong<sup>3</sup>, Xiuyu Wang<sup>1</sup>, Aiping Lan<sup>1</sup>, Fanqin Zeng<sup>4</sup>, Peixi Chen<sup>1</sup>, Chuhuai Wang<sup>5</sup>\*, Jianqiang Feng<sup>1</sup>\*

**1** Department of Physiology, Zhongshan School of Medicine, Sun Yat-sen University, Guangzhou, China, **2** School of Nursing, Sun Yat-sen University, Guangzhou, China, **3** Department of Physiology, Guangzhou Medical College, Guangzhou, China, **4** Department of Dermatology, Sun Yat-sen Memorial Hospital, Sun Yat-sen University, Guangzhou, China, **5** Department of Rehabilitation, The First Affiliated Hospital, Sun Yat-sen University, Guangzhou, China

## Abstract

Hydrogen sulfide (H<sub>2</sub>S) has been shown to protect against oxidative stress injury and inflammation in various hypoxia-induced insult models. However, it remains unknown whether H<sub>2</sub>S protects human skin keratinocytes (HaCaT cells) against chemical hypoxia-induced damage. In the current study, HaCaT cells were treated with cobalt chloride (CoCl<sub>2</sub>), a well known hypoxia mimetic agent, to establish a chemical hypoxia-induced cell injury model. Our findings showed that pretreatment of HaCaT cells with NaHS (a donor of H<sub>2</sub>S) for 30 min before exposure to CoCl<sub>2</sub> for 24 h significantly attenuated CoCl<sub>2</sub>-induced injuries and inflammatory responses, evidenced by increases in cell viability and GSH level and decreases in ROS generation and secretions of IL-1 $\beta$ , IL-6 and IL-8. In addition, pretreatment with NaHS markedly reduced CoCl<sub>2</sub>-induced COX-2 overexpression and PGE<sub>2</sub> secretion as well as intranuclear NF- $\kappa$ B p65 subunit accumulation (the central step of NF- $\kappa$ B activation). Similar to the protective effect of H<sub>2</sub>S, both NS-398 (a selective COX-2 inhibitor) and PDTC (a selective NF- $\kappa$ B inhibitor) depressed not only CoCl<sub>2</sub>-induced cytotoxicity, but also the secretions of IL-1 $\beta$ , IL-6 and IL-8. Importantly, PDTC obviously attenuated overexpression of COX-2 induced by CoCl<sub>2</sub>. Notably, NAC, a ROS scavenger, conferred a similar protective effect of H<sub>2</sub>S against CoCl<sub>2</sub>-induced insults and inflammatory responses. Taken together, the findings of the present study have demonstrated for the first time that H<sub>2</sub>S protects HaCaT cells against CoCl<sub>2</sub>-induced injuries and inflammatory responses through inhibition of ROS-activated NF- $\kappa$ B/COX-2 pathway.

**Citation:** Yang C, Yang Z, Zhang M, Dong Q, Wang X, et al. (2011) Hydrogen Sulfide Protects against Chemical Hypoxia-Induced Cytotoxicity and Inflammation in HaCaT Cells through Inhibition of ROS/NF- $\kappa$ B/COX-2 Pathway. PLoS ONE 6(7): e21971. doi:10.1371/journal.pone.0021971

**Editor:** Sudha Agarwal, Ohio State University, United States of America

**Received:** March 4, 2011; **Accepted:** June 14, 2011; **Published:** July 14, 2011

**Copyright:** © 2011 Yang et al. This is an open-access article distributed under the terms of the Creative Commons Attribution License, which permits unrestricted use, distribution, and reproduction in any medium, provided the original author and source are credited.

**Funding:** This work was supported by Science and Technology Planning Project of Guangdong Province in China (2010B080701035, 2008B080703053). The funders had no role in study design, data collection and analysis, decision to publish, or preparation of the manuscript.

**Competing Interests:** The authors have declared that no competing interests exist.

\* E-mail: fengjq-sums@163.com (JF); rehab@163.com (CW)

† These authors contributed equally to this work.

## Introduction

Hydrogen sulfide (H<sub>2</sub>S), an endogenous gaseous mediator, is produced by pyridoxal-5'-phosphate-dependent enzymes, including cystathionine- $\gamma$ -lyase (CGL, CSE), cystathionine- $\beta$ -synthase (CBS) and 3-mercaptopyruvate sulfurtransferase (3-MST), during cysteine metabolism [1,2]. Along with nitric oxide (NO) and carbon monoxide (CO), H<sub>2</sub>S is considered as the third signaling gasotransmitter, which plays important physiological and pathophysiological roles both *in vivo* and *in vitro* [3,4]. Accumulating evidence suggests that H<sub>2</sub>S exerts protective effects against various stimuli-triggered injuries in many organs including heart, liver and kidney [5,6,7]. One of the most important mechanisms responsible for H<sub>2</sub>S protection is antioxidation, which exerts its effect not only by increasing reduced glutathione (GSH) in neurons [8], but also by directly scavenging superoxide anions, hydrogen peroxide (H<sub>2</sub>O<sub>2</sub>) [9] and peroxynitrite [10] to suppress oxidative stress. The exact role of H<sub>2</sub>S in inflammation is controversial since both pro- and anti-inflammatory effects have been documented [11]. In sepsis, H<sub>2</sub>S provokes an inflammatory response via the extracel-

lular signal-regulated kinase (ERK) pathway [12]. However, in lipopolysaccharide-stimulated microglia and astrocytes, H<sub>2</sub>S has an antiinflammatory effect [13]. To our knowledge, the role of H<sub>2</sub>S in hypoxia-caused dermatic injury has not been reported.

Hypoxia of skin is a common clinical event, which mediates dermatic injury in various diseases, such as pressure ulcer [14], diabetic ulcer [15,16] and venous ulcer [17]. Insufficient blood or oxygen supply is considered as one of the most important causal factors, leading to non-healing chronic ulcers [18,19,20]. Overproduction of reactive oxygen species (ROS) caused by persistent hypoxia and disordered oxidative phosphorylation leads to dermatic injury. It has been demonstrated that pretreatment with the common antioxidant vitamin E significantly decreases pressure-induced skin lesions in pigs [21]. In addition, local administration of  $\beta$ -glucan suppresses skin injury by inhibiting malondialdehyde (MDA) production and raising GSH content [22]. The antioxidative effect of H<sub>2</sub>S has been demonstrated in a variety of cell models [8,9,10,23]. Therefore, we hypothesize that H<sub>2</sub>S can also protect dermatic cells against oxidative stress-induced injury.

Inflammation is another mediator in dermatic injury induced by hypoxia. Cyclooxygenase (COX) and its catalyzates, prostaglandins (PGs), are among the most important pro-inflammatory mediators. In chronic venous leg ulcers, COX-2 expression is upregulated and therefore responsible for persistent inflammation [24]. The selective inhibitors of COX-2 are effective in the treatment of this kind of disease. In addition, the protein complex nuclear factor kappa B (NF- $\kappa$ B) regulates inflammatory responses by inducing the expression of a variety of genes. NF- $\kappa$ B comprises a family of transcription factors, including the subunit members p50 (NF- $\kappa$ B1), p52 (NF- $\kappa$ B2), p65 (RelA), RelB and c-Rel [24]. Nuclear translocation of p65 subunit is a key step in the activation of NF- $\kappa$ B. In hypoxia-damaged HEI-OC1 mouse auditory cells, NF- $\kappa$ B and hypoxia-inducible factor-1 (HIF-1) are activated, thereby triggering interleukin-6 (IL-6) overproduction [25]. Our more recent study has demonstrated that chemical hypoxia induces inflammatory response and cytotoxicity through ROS-activated NF- $\kappa$ B/COX-2 pathway in human skin keratinocytes (HaCaT cells) [26]. However, it remains largely unknown whether H<sub>2</sub>S can abrogate this inflammatory response and cytotoxicity by inhibiting the ROS-activated NF- $\kappa$ B/COX-2 pathway in hypoxia-stimulated HaCaT cells.

In the present study, we investigated the cytoprotection of H<sub>2</sub>S in HaCaT cells treated with cobalt chloride (CoCl<sub>2</sub>), a well-known mimetic agent of hypoxia/ischemia, which induces oxidative stress [27,28] and inflammation [29,30]. HaCaT cells are derived from spontaneous transformation of human adult keratinocytes, and have been widely used in dermatopathological studies [31,32]. Our findings showed that H<sub>2</sub>S protected HaCaT cells against CoCl<sub>2</sub>-induced injury and inflammatory response by inhibiting the ROS-activated NF- $\kappa$ B/COX-2 pathway.

## Materials and Methods

### Materials and cell culture

Sodium hydrosulfide (NaHS), CoCl<sub>2</sub>, N-acetyl-L-cysteine (NAC), pyrrolidine dithiocarbamate (PDTTC), N-(2-cyclohexyloxy-4-nitrophenyl)-methane sulfonamide (NS-398) and 2',7'-dichlorofluorescein diacetate (DCFH-DA) were purchased from Sigma-Aldrich (St Louis, MO). Cell Counter Kit-8 (CCK-8) was bought from Dojindo Laboratories (Kyushu, Japan). The GSH assay kit was obtained from Beyotime Institute of Biotechnology (Haimen, China). Enzyme-linked immunosorbent assay (ELISA) kits were provided by Boster BioTech. (Wuhan, China). Dulbecco's modified Eagle's medium F12 (DMEM/F12) and fetal bovine serum (FBS) were supplied by Gibco-BRL (Carlsbad, CA). HaCaT cells were generously provided by Professor Fanqin Zeng (Department of Dermatology, Sun Yat-sen Memorial Hospital, Sun Yat-sen University, Guangzhou, China) and maintained in DMEM/F12 supplemented with 10% FBS at 37°C under an atmosphere of 5% CO<sub>2</sub> and 95% air.

### Cell viability assay

Cell viability was detected using CCK-8. HaCaT cells were cultured in 96-well plates, with 4 duplicate wells in each group. When 70–80% confluence was reached, the cells were treated with conditioned medium as indicated. The CCK-8 solution (10  $\mu$ L) at a 1:10 dilution with FBS-free DMEM/F12 (100  $\mu$ L) was added to each well followed by a further 3 h incubation at 37°C. Absorbance was measured at 450 nm with a microplate reader (Molecular Devices, Sunnyvale, CA). The mean optical density (OD) of 4 wells in the indicated groups was used to calculate the percentage of cell viability as follows: percentage of cell viability = (OD<sub>treatment group</sub> - OD<sub>blank group</sub>) / (OD<sub>control group</sub> - OD<sub>blank group</sub>)  $\times$  100%. The experiment was performed in triplicate.

### Measurement of inflammatory factors by ELISA

Secretions of IL-6, IL-8, IL-1 $\beta$  and prostaglandin E<sub>2</sub> (PGE<sub>2</sub>) were determined by ELISA. HaCaT cells were plated in 96-well plates. After the cells were treated as indicated, the relative content of each secreted inflammatory factor in the supernatant was measured by ELISA according to the manufacturer's instructions (Boster BioTech, Wuhan, China). The relative content of the inflammatory factor in culture medium was normalized to cell viability. The experiment was carried out in triplicate.

### Western blot analysis

HaCaT cells were plated in 35 mm diameter petri dishes. When growing to 70–80% confluence, the cells were treated as indicated. At the end of treatments, HaCaT cells were harvested and resuspended in ice-cold cell lysis solution and the homogenate was centrifuged at 10,000 $\times$ g for 15 min at 4°C. Total proteins in the supernatant were measured using a bicinchoninic acid (BCA) protein assay kit (Kangchen BioTech, Shanghai, China). Thirty micrograms of total proteins from each sample were separated by 12% sodium dodecyl sulphate–polyacrylamide gel electrophoresis (SDS-PAGE). The proteins in the gel were transferred into a polyvinylidene difluoride (PVDF) membrane. The membrane was blocked with 5% fat-free dry milk in TBS-T for 1 h at room temperature, and then

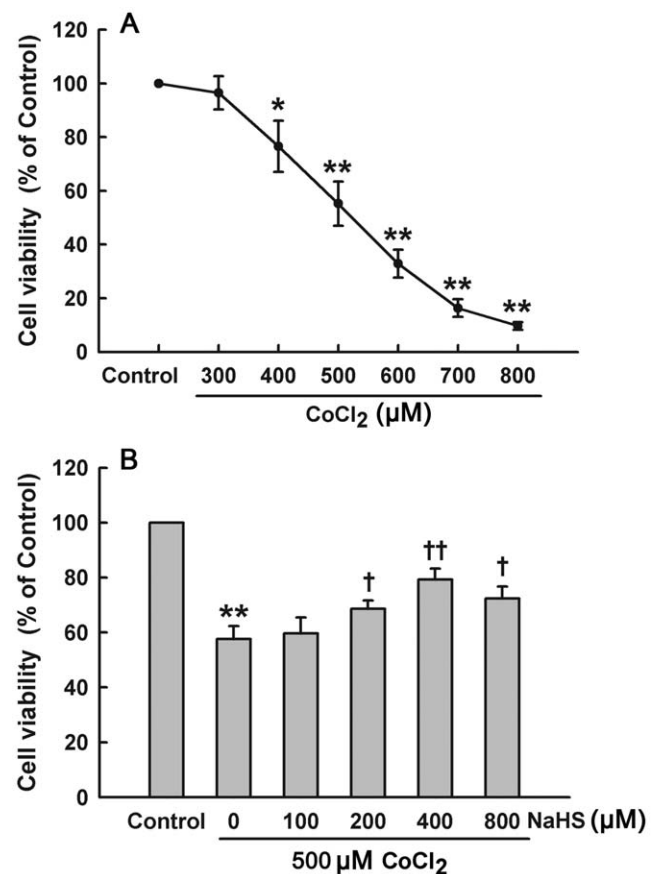

**Figure 1. H<sub>2</sub>S protects HaCaT cells against CoCl<sub>2</sub>-elicited cytotoxicity.** (A) HaCaT cells were treated with CoCl<sub>2</sub> at indicated concentrations for 24 h. (B) Before exposure to 500  $\mu$ M CoCl<sub>2</sub> for 24 h, HaCaT cells were pretreated with different concentrations of NaHS for 30 min. Cell viability was measured by CCK-8 assay. Data were shown as the mean  $\pm$  SE. \* $P$ <0.05, \*\* $P$ <0.01 compared with control group, † $P$ <0.05, †† $P$ <0.01 compared with CoCl<sub>2</sub> treatment group. doi:10.1371/journal.pone.0021971.g001

incubated with the primary antibody specific to COX-1, COX-2, p65 subunit (Bioworld Technology, USA) or horseradish peroxidase (HRP)-conjugated  $\beta$ -actin (Kangchen BioTech, Shanghai, China) overnight with gentle agitation at 4°C. The next day, the membrane was washed and subsequently incubated with HRP-conjugated secondary antibodies for 1.5 h at room temperature. Following 3 washes with TBST, the membranes were developed using an enhanced chemiluminescence (ECL) kit (Applygen Technologies, Beijing, China) and exposed to X-ray films. Image J 1.41o software (National Institute of Health, Bethesda, MD, USA) was used to quantitatively analyze protein expression level.

### Measurement of ROS

Intracellular ROS content was determined by DCF staining followed by photofluorography. DCF is a fluorescent substance derived from cell-permeable DCFH-DA. HaCaT cells were cultured on a slide in DMEM-F12. DCFH-DA in FBS-free DMEM-F12 was added at a final concentration of 10  $\mu$ M to the HaCaT cells. Cells were then incubated at 37°C for 30 min and the indicated treatments were performed. After all the treatments were accomplished, the slides were washed 3 times with FBS-free DMEM/F12, and DCF fluorescence was measured over the entire

field of vision with a fluorescent microscope connected to an imaging system (BX50-FLA; Olympus, Tokyo). Mean fluorescence intensity, which represents the amount of intracellular ROS from 3 random fields, was analyzed using Image J 1.41o software.

### Measurement of GSH

The intracellular GSH content was measured using a commercially available kit (Beyotime Institute of Biotechnology, Haimen, China) as described previously [33]. The assay is based on the spectrophotometric measurement of 5-thio-2-nitrobenzoate (TNB), the product of a reaction with GSH. TNB was measured by detecting absorbance at 412 nm using a microplate reader. The obtained data were normalized to cell number. The experiment was carried out in triplicate.

### Statistics

All data were representative of experiments done in triplicate and were expressed as the mean  $\pm$  standard error (SE). The assessment of differences between groups was analyzed by one-way ANOVA using SPSS 13.0 software. The differences between groups were compared with the least significant difference (LSD) test. Differences were considered significant if the probability (*P*)-value was <0.05.

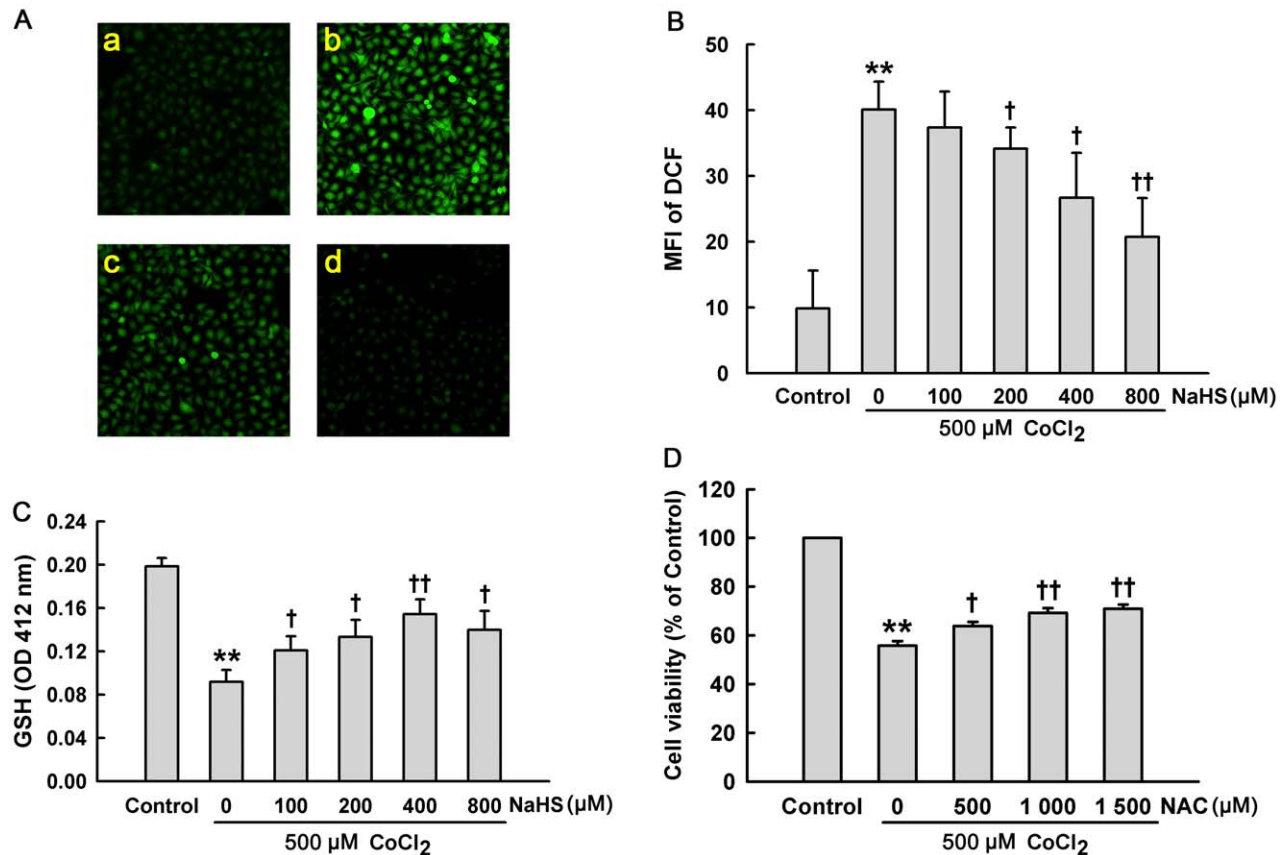

**Figure 2. H<sub>2</sub>S reduces CoCl<sub>2</sub>-elicited oxidative stress in HaCaT cells.** (A) a–d DCF staining followed by photofluorography to observe intracellular ROS level. (a) Control group. (b) HaCaT cells exposed to 500  $\mu$ M CoCl<sub>2</sub> for 2 h. (c) HaCaT cells were pretreated 400  $\mu$ M NaHS for 30 min before exposure to CoCl<sub>2</sub> at 500  $\mu$ M for 2 h and (d) HaCaT cells were treated with 400  $\mu$ M NaHS for 30 min followed by 2 h culture. (B) HaCaT cells were exposed to 500  $\mu$ M CoCl<sub>2</sub> for 2 h in the absence or presence of pre-incubation with the indicated concentrations of NaHS for 30 min. Quantitative analysis of the mean fluorescence intensity (MFI) of DCF with Image J 1.41o software. (C) HaCaT cells were exposed to 500  $\mu$ M CoCl<sub>2</sub> for 24 h in the absence or presence of pre-incubation with the indicated concentrations of NaHS for 30 min. The intensity of TNB (indicating GSH content) was measured at 412 nm with a microplate reader. (D) HaCaT cells were exposed to 500  $\mu$ M CoCl<sub>2</sub> for 24 h in the absence or presence of pre-incubation with NAC at the indicated concentrations for 60 min. Cell viability was measured by CCK-8 assay. Data were shown as the mean  $\pm$  SE. \*\**P*<0.01 compared with control group. †*P*<0.05, ††*P*<0.01 compared with CoCl<sub>2</sub> treatment group. doi:10.1371/journal.pone.0021971.g002

## Results

### H<sub>2</sub>S inhibits CoCl<sub>2</sub>-induced cytotoxicity in HaCaT cells

To investigate the effect of H<sub>2</sub>S on CoCl<sub>2</sub>-induced cytotoxicity, cell viability was detected by CCK-8 assay. As shown in Figure 1A, exposure of HaCaT cells to CoCl<sub>2</sub> at concentrations ranging from 300 to 800  $\mu$ M for 24 h led to a decrease in cell viability in a dose-dependant manner. However, the decreased cell viability induced by 500  $\mu$ M CoCl<sub>2</sub> treatment for 24 h was significantly inhibited by pretreatment with NaHS (a H<sub>2</sub>S donor) at 200, 400 or 800  $\mu$ M for 30 min, respectively (Figure 1B). The results indicate that H<sub>2</sub>S pretreatment protects against CoCl<sub>2</sub>-induced toxicity in HaCaT cells.

### H<sub>2</sub>S ameliorates CoCl<sub>2</sub>-induced oxidative stress in HaCaT cells

To elucidate whether the cytoprotection of H<sub>2</sub>S was associated with its antioxidation in CoCl<sub>2</sub>-stimulated HaCaT cells, intracellular ROS and GSH levels were measured. Exposure of HaCaT cells to 500  $\mu$ M CoCl<sub>2</sub> for 2 h led to a noticeable increase in ROS level (Figure 2A-b and 2B). Prior to the CoCl<sub>2</sub> exposure, pretreatment with NaHS at concentrations ranging from 100 to 800  $\mu$ M for 30 min decreased intracellular ROS level in HaCaT cells (Figure 2A-c and 2B). Additionally, treatment of HaCaT cells with 500  $\mu$ M CoCl<sub>2</sub> for 24 h significantly decreased GSH level (Figure 2C), indicating that CoCl<sub>2</sub> treatment impairs the endogenous antioxidant defense mechanism. Importantly, pretreatment with NaHS (100~800  $\mu$ M) obviously attenuated the inhibitory effect of CoCl<sub>2</sub> on GSH level in HaCaT cells (Figure 2C). Further data showed that NAC, a common ROS scavenger, significantly attenuated the cytotoxicity induced by CoCl<sub>2</sub> treatment in HaCaT cells (Figure 2D). These findings suggest that the inhibition of cytotoxicity of H<sub>2</sub>S is associated with its antioxidant effect.

### H<sub>2</sub>S represses CoCl<sub>2</sub>-induced inflammatory factor secretions from HaCaT cells

Next we measured IL-6, IL-8 and IL-1 $\beta$  secretions in response to NaHS and CoCl<sub>2</sub>. After exposure of HaCaT cells to 500  $\mu$ M CoCl<sub>2</sub> for 24 h, IL-6 (Figure 3A), IL-8 (Figure 3B) and IL-1 $\beta$  (Figure 3C) secretions were significantly increased, respectively. Pretreatment with NaHS (200 and 400  $\mu$ M) for 30 min before exposure to CoCl<sub>2</sub> markedly inhibited IL-6 (Figure 3A), IL-8 (Figure 3B) and IL-1 $\beta$  (Figure 3C) secretions from HaCaT cells, respectively. These results suggest that H<sub>2</sub>S possesses an anti-inflammatory effect in CoCl<sub>2</sub>-damaged HaCaT cells.

### Downregulation of COX-2/PGE<sub>2</sub> overexpression contributes to the cytoprotection of H<sub>2</sub>S in CoCl<sub>2</sub>-stimulated HaCaT cells

After treatment of HaCaT cells with 500  $\mu$ M CoCl<sub>2</sub> for 6 h, expression of COX-2 was significantly augmented, while expression of COX-1 was not significantly changed (Figure 4A and B). Pretreatment with NaHS at 200 and 400  $\mu$ M for 30 min markedly attenuated the overexpression of COX-2 induced by CoCl<sub>2</sub> treatment (Figure 4A and B). Furthermore, exposure of HaCaT cells to 500  $\mu$ M CoCl<sub>2</sub> for 6 h resulted in an obvious increase in PGE<sub>2</sub> secretion, which was blocked by pretreatment with NaHS at 200 and 400  $\mu$ M for 30 min (Figure 4C). Additionally, pretreatment with NS-398, a selective inhibitor of COX-2, could imitate the roles of H<sub>2</sub>S in inhibition of inflammatory factor secretions, including IL-6 (Figure 5A), IL-8 (Figure 5B) and IL-1 $\beta$  (Figure 5C), as well as cytotoxicity (Figure 5D) induced by the CoCl<sub>2</sub>. These findings suggest that COX-2/PGE<sub>2</sub> pathway mediates CoCl<sub>2</sub>-induced cytotoxicity and inflammatory response, and that the

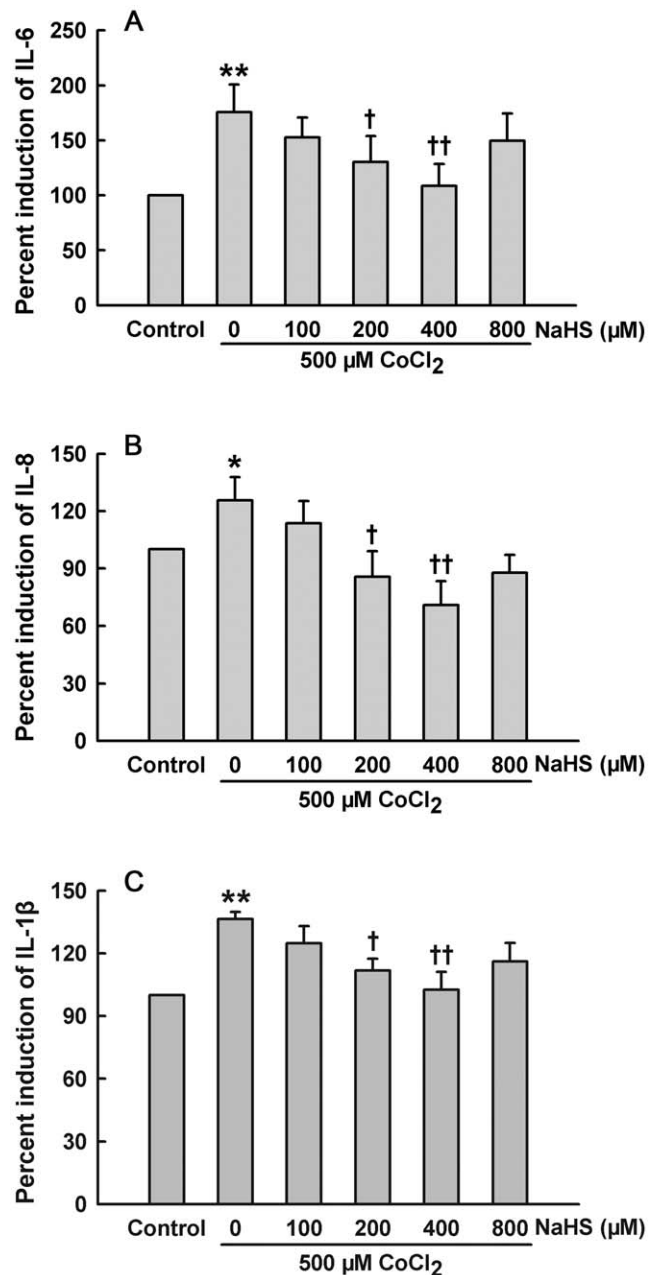

**Figure 3. H<sub>2</sub>S inhibits CoCl<sub>2</sub>-induced IL-6, IL-8 and IL-1 $\beta$  secretions from HaCaT cells.** HaCaT cells were exposed to 500  $\mu$ M CoCl<sub>2</sub> for 24 h in the absence or presence of pretreatment with NaHS at the indicated concentrations for 30 min. ELISA was performed to detect the levels of IL-6 (A), IL-8 (B) and IL-1 $\beta$  (C) in cell supernatants. Data were shown as the mean  $\pm$  SE. \* $P$ <0.05, \*\* $P$ <0.01 compared with control group. † $P$ <0.05, †† $P$ <0.01 compared with CoCl<sub>2</sub> treatment group. doi:10.1371/journal.pone.0021971.g003

inhibition of CoCl<sub>2</sub>-induced COX-2/PGE<sub>2</sub> overexpression is involved in the H<sub>2</sub>S-triggered protective effect in HaCaT cells.

### Inhibition of nuclear translocation of NF- $\kappa$ B p65 subunit is implicated in the cytoprotection of H<sub>2</sub>S in CoCl<sub>2</sub>-stimulated HaCaT cells

Exposure of HaCaT cells to 500  $\mu$ M CoCl<sub>2</sub> from 1 to 4 h significantly enhanced intranuclear NF- $\kappa$ B p65 subunit expression, the central step of NF- $\kappa$ B activation, compared with quiescent

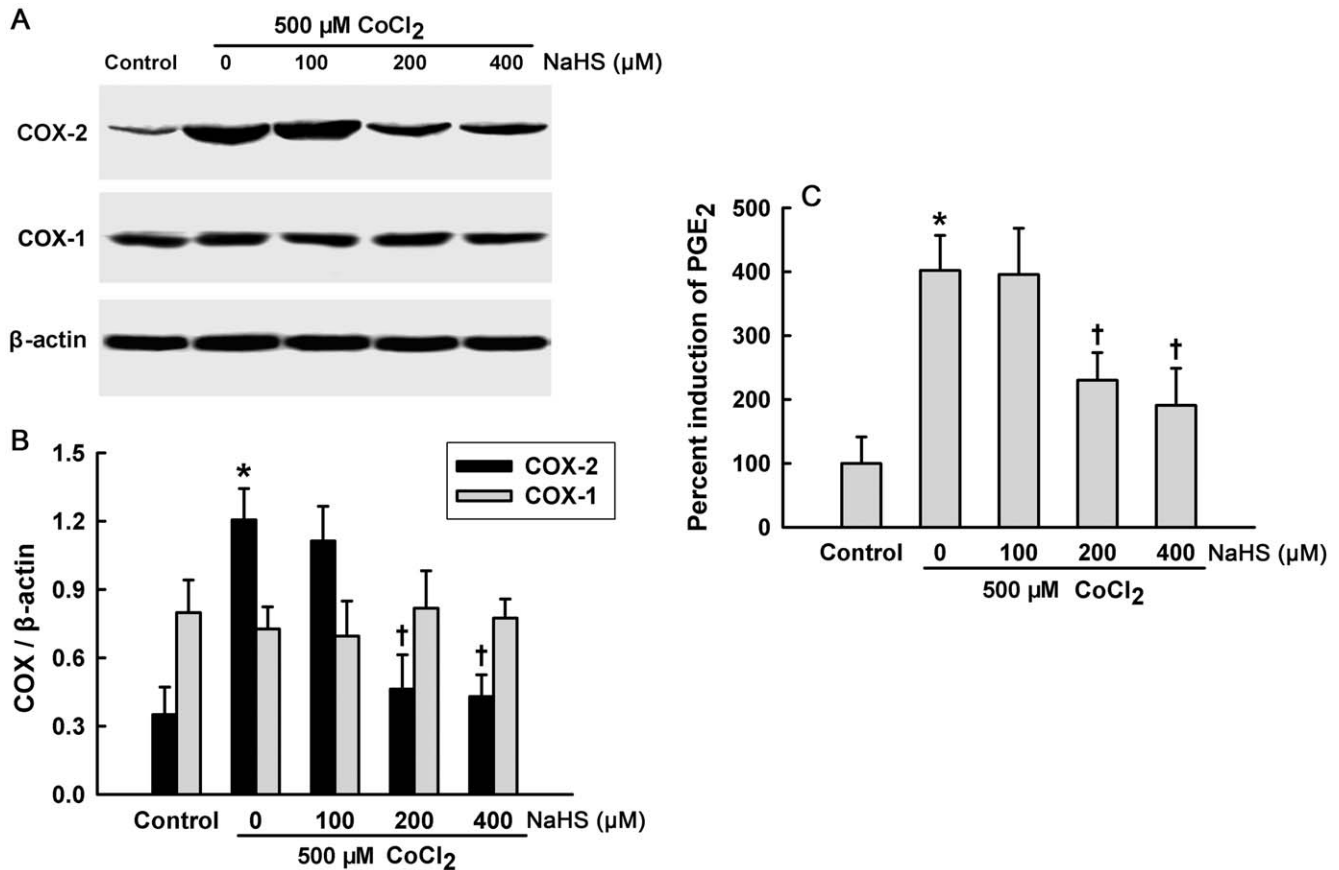

**Figure 4. Effect of H<sub>2</sub>S on CoCl<sub>2</sub>-induced COX-2/PGE<sub>2</sub> overexpression.** HaCaT cells were incubated with 500  $\mu$ M CoCl<sub>2</sub> for 6 h in the absence or presence of pretreatment with NaHS at the indicated concentrations for 30 min. (A) Cell lysates were subjected to Western blot analysis using COX-2- or COX-1-specific antibody. (B) The intensity of the protein bands of a typical experiment was quantified with Image J 1.41o software. (C) PGE<sub>2</sub> level in cell supernatants was measured by ELISA. Data were shown as the mean  $\pm$  SE. \* $P$ <0.01 compared with control group. † $P$ <0.01 compared with CoCl<sub>2</sub> treatment group. doi:10.1371/journal.pone.0021971.g004

cells. This enhancement peaked at 2 h (Figure 6 A and B), indicating that CoCl<sub>2</sub> exposure may evoke NF- $\kappa$ B activation. Before exposure to 500  $\mu$ M CoCl<sub>2</sub> for 2 h, pretreatment of HaCaT cells with 400  $\mu$ M NaHS for 30 min (Figure 6 C and D) significantly inhibited NF- $\kappa$ B p65 subunit nuclear translocation. Importantly, pretreatment with PDTC (10  $\mu$ M), a selective inhibitor of NF- $\kappa$ B, for 30 min before exposure to CoCl<sub>2</sub> abrogated not only CoCl<sub>2</sub>-induced COX-2 overexpression (Figure 6 E and F), but also the secretions of IL-6 (Figure 5A), IL-8 (Figure 5B) and IL-1 $\beta$  (Figure 5C). In addition, pretreatment with PDTC also inhibited CoCl<sub>2</sub>-induced cytotoxicity (Figure 5D). These results suggest that the protection of H<sub>2</sub>S against inflammation and cytotoxicity caused by CoCl<sub>2</sub> is partially associated with the inhibition of NF- $\kappa$ B activation in HaCaT cells.

#### Inhibition of oxidative stress is involved in the protection of H<sub>2</sub>S against inflammation in CoCl<sub>2</sub>-treated HaCaT cells

Since antioxidation was implicated in the inhibitory effect of H<sub>2</sub>S on CoCl<sub>2</sub>-induced cytotoxicity, we further explored the role of antioxidation in H<sub>2</sub>S-triggered cytoprotection against CoCl<sub>2</sub>-induced inflammatory response. Similar to the anti-inflammatory effect of H<sub>2</sub>S, pretreatment of HaCaT cells with NAC suppressed secretions of IL-6 (Figure 5A), IL-8 (Figure 5B) and IL-1 $\beta$  (Figure 5C) induced by CoCl<sub>2</sub>. Further studies showed that pretreatment with NAC inhibited CoCl<sub>2</sub>-induced NF- $\kappa$ B p65

nuclear translocation (Figures 6C and D) and COX-2 overexpression (Figures 6E and F), so did NaHS pretreatment. The above results indicate that inhibition of oxidative stress may attribute to the protective effect of H<sub>2</sub>S against CoCl<sub>2</sub>-induced inflammatory response in HaCaT cells.

#### Discussion

Hypoxia-induced dermatic injury occurs in many diseases, including pressure ulcers [14], diabetic ulcers [15] and venous ulcers [17]. Oxidative stress and inflammatory response are two key risk factors of these diseases. Anti-inflammatory medicines, such as steroid and non-steroid, have been used for the treatment of these diseases. However, these medicines have adverse side effects, such as increased susceptibility to infection, impaired glucose tolerance in diabetes, osteoporosis and gastrointestinal pain. It is therefore necessary to discover compounds with high efficacy and fewer side effects. H<sub>2</sub>S, an endogenous gaseous mediator, exerts various physiological and physiopathological effects *in vivo*, including anti-oxidative stress and anti-inflammatory response in heart, liver, kidney and other organs [5,6,7,34]. We therefore hypothesize that H<sub>2</sub>S may confer protective effects against hypoxia-induced dermatic injury.

In the present study, chemical hypoxia was induced in the human skin keratinocytes (HaCaT cells) by exposure to CoCl<sub>2</sub>. This chemical hypoxic agent can take the place of ferrous ions in

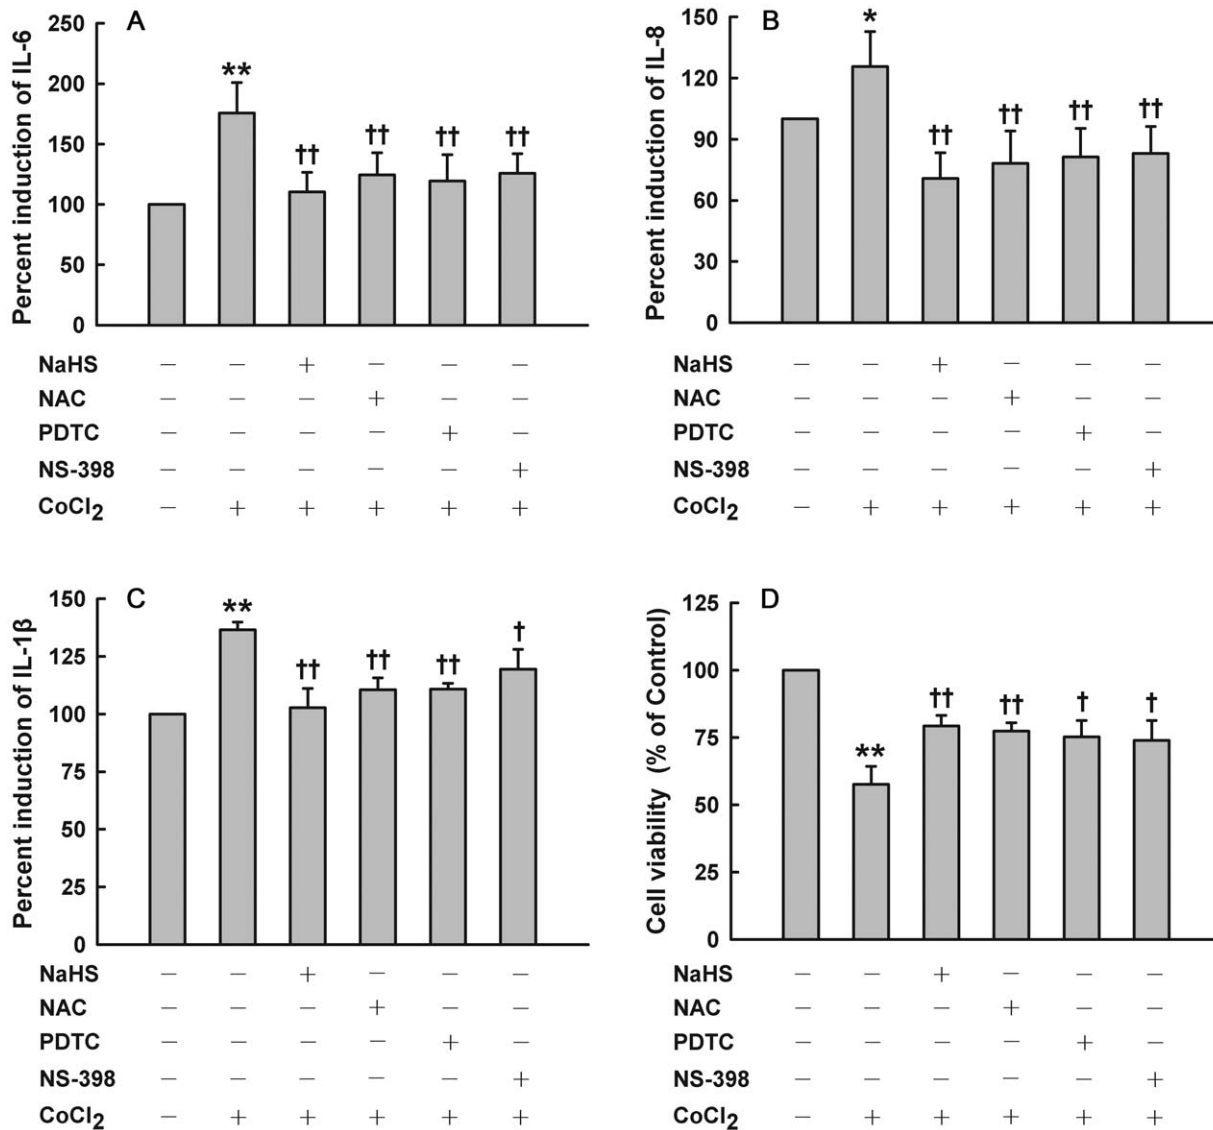

**Figure 5. Effects of indicated treatments on secretions of IL-6, IL-8 and IL-1β secretions as well as cytotoxicity induced by CoCl<sub>2</sub> in HaCaT cells.** Before treatment with 500 μM CoCl<sub>2</sub> for 24 h, HaCaT cells were pretreated with 400 μM NaHS, 10 μM PDTC or 10 μM NS-398 for 30 min, or 1000 μM NAC for 60 min, respectively. IL-6 (A), IL-8 (B) and IL-1β (C) secretions were detected by ELISA. (D) Cell viability was measured by CCK-8 assay. Data were shown as the mean ± SE. \*P<0.05, \*\*P<0.01 compared with control group. †P<0.05, ††P<0.01 compared with CoCl<sub>2</sub> treatment group.

doi:10.1371/journal.pone.0021971.g005

prolyl-4-hydroxylase (P4H), thereby causing a conformational change in the P4H protein which consequently leads to a hypoxic condition, characterized by intranuclear accumulation of hypoxia inducible factor 1 alpha (HIF-1α) [35,36,37]. Our results showed that exposure of HaCaT cells to CoCl<sub>2</sub> led to cytotoxicity, evidenced by the decreased cell viability. To investigate whether H<sub>2</sub>S can protect HaCaT cells against CoCl<sub>2</sub>-induced cytotoxicity, HaCaT cells were pretreated with NaHS (a H<sub>2</sub>S donor) at concentrations ranging from 100 to 800 μM for 30 min before exposure to CoCl<sub>2</sub>. Interestingly, we found that pretreatment with NaHS significantly attenuated CoCl<sub>2</sub>-induced cytotoxicity in HaCaT cells. This anti-cytotoxic effect of H<sub>2</sub>S is similar to our previous results in H9c2 myocardial cells [38] and PC12 cells [39]. A recent study showed that NaHS (10 to 1000 μM) treatment for 20 min can protect human umbilical vein endothelial cells

(HUVECs) and fibroblasts (3T3s) against ischemia-reperfusion (I/R)-induced apoptosis [40]. In addition, there are other studies reporting the protective effects of H<sub>2</sub>S in heart, liver, kidney and skin [5,6,7,40], which provides a foundation for our current study. However, Gobbi *et al.* reported that H<sub>2</sub>S impairs keratinocyte growth and adhesion [41], which is opposite to our findings. In that study, NaHS concentrations were used ranging from 500 to 2000 μM and the treatment period ranging from 24 to 72 h. The difference between their results and ours may be due to differences in NaHS treatment mode.

Another important finding of this study was that H<sub>2</sub>S inhibited oxidative stress induced by CoCl<sub>2</sub> in HaCaT cells. We used DCF staining followed by photofluorography to detect intracellular ROS level. We found that exposure to CoCl<sub>2</sub> elicited a marked increase in ROS generation in HaCaT cells. The increased ROS

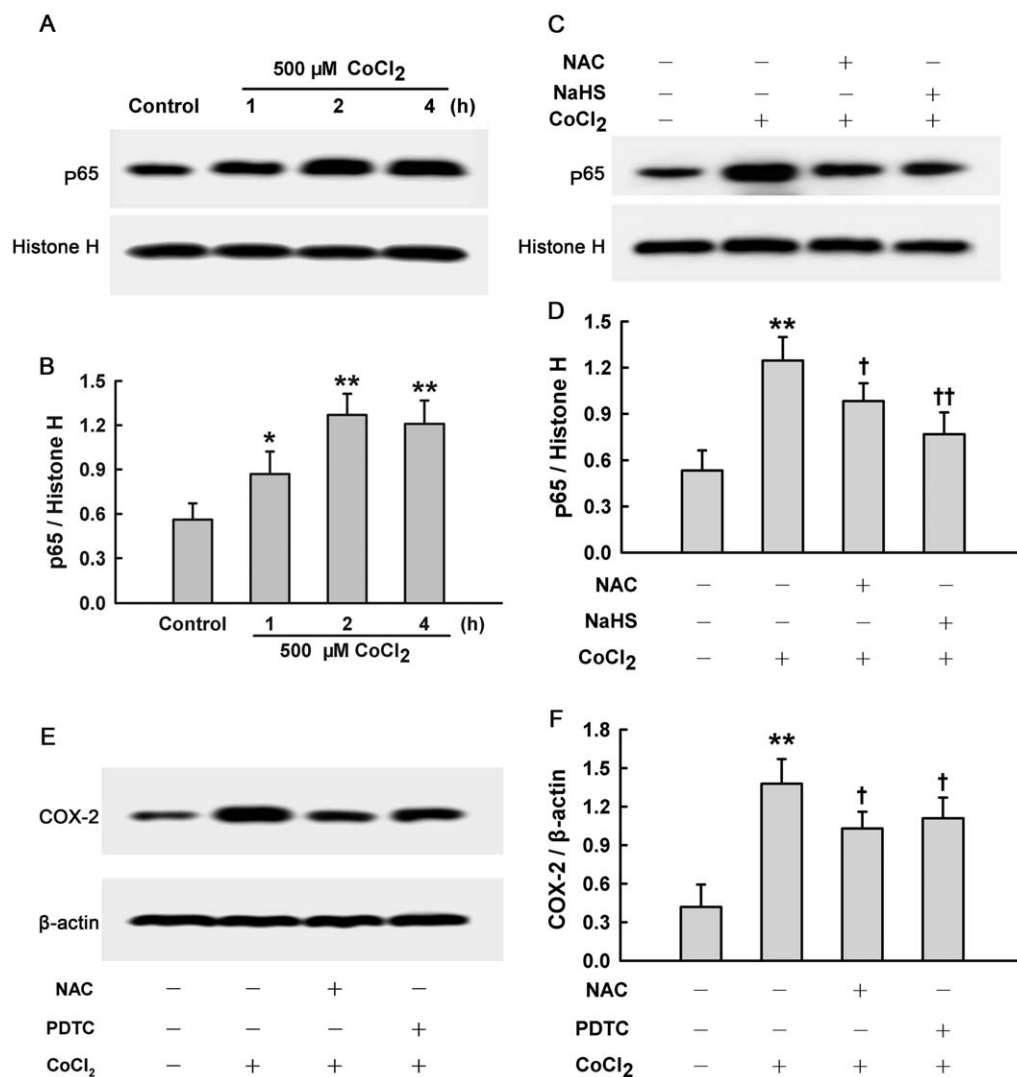

**Figure 6. Effects of different treatments on CoCl<sub>2</sub>-induced intranuclear accumulation of NF-κB p65 subunit and overexpression of COX-2 in HaCaT cells.** (A) HaCaT cells were treated with 500 μM CoCl<sub>2</sub> for the indicated times. (C) HaCaT cells were pretreated with 400 μM NaHS for 30 min or 1000 μM NAC for 60 min followed by treatment with 500 μM CoCl<sub>2</sub> for 2 h. Nuclear extract lysates were subjected to Western blot analysis using p65-specific antibody. (E) HaCaT cells were treated with 500 μM CoCl<sub>2</sub> for 6 h in the absence or presence of pretreatment with 1000 μM NAC for 60 min or 10 μM PDTC for 30 min. Cell lysates were subjected to Western blot analysis using COX-2-specific antibody. Panels B, D and F show the intensity of the protein bands of typical experiments from A, C and E, respectively. Data were shown as the mean ± SE. \**P*<0.05, \*\**P*<0.01 compared with control group. †*P*<0.05, ††*P*<0.01 compared with CoCl<sub>2</sub> treatment group. doi:10.1371/journal.pone.0021971.g006

production was significantly abrogated by pretreatment with NaHS. We speculated that one of the mechanisms underlying NaHS-induced ROS elimination may be associated with a direct chemical reaction with H<sub>2</sub>O<sub>2</sub>. Geng *et al.* reported that H<sub>2</sub>S directly scavenges superoxide anions and H<sub>2</sub>O<sub>2</sub>, and consequently eliminates ROS-induced MDA generation [9]. We also found that NAC, a ROS scavenger, afforded the similar protective effect of H<sub>2</sub>S. Another mechanism for the inhibition of oxidative stress by H<sub>2</sub>S may be associated with enhancing the endogenous antioxidative defense ability. For instance, GSH, a potent endogenous antioxidant, can eliminate ROS and be oxidized into glutathione disulfide [21]. In agreement with the previous evidence that NaHS reverses H<sub>2</sub>O<sub>2</sub>-impaired GSH production [23], our findings showed that H<sub>2</sub>S pretreatment effectively antagonized CoCl<sub>2</sub>-induced decrease in GSH level. Similarly, it has been shown that treatment with exogenous vitamin E suppresses pressure-induced

skin lesions by inhibiting H<sub>2</sub>O<sub>2</sub> generation and GSH loss [21]. Therefore, H<sub>2</sub>S pretreatment triggers a cytoprotective effect at least in part by its antioxidative function.

Inflammatory response is an important injury factor in hypoxia-induced dermatologic ulcers. In this study, besides cytotoxicity and oxidative stress, chemical hypoxia induced inflammatory response, which was evidenced by increases in IL-6, IL-8 and IL-1β secretions. Importantly, we observed that pretreatment with NaHS significantly attenuated CoCl<sub>2</sub>-stimulated IL-6, IL-8 and IL-1β secretions from HaCaT cells, suggesting that H<sub>2</sub>S can protect HaCaT cells against chemical hypoxia-induced inflammatory response. In macrophages, H<sub>2</sub>S has been shown to attenuate lipopolysaccharide-induced formation of inflammatory mediators, including IL-6 [11]. In addition, H<sub>2</sub>S also inhibits IL-6 secretion of fibroblasts isolated from the synovial membrane of rheumatoid arthritis patients [42]. The above previous studies [11,42] support our study.

COX-2 is a potent pro-inflammation mediator, which can promote the production of many inflammatory factors in various experiments. A previous study showed that COX-2 mRNA expression is upregulated in rat skin suffering from I/R lesion, and the selective inhibitor of COX-2, NS-398, abrogates nicotine aggravated-skin necrosis induced by I/R [43]. Our current study showed that exposure of HaCaT cells to CoCl<sub>2</sub> elevated expression of COX-2 and induction of PGE<sub>2</sub>. The pretreatment with NaHS for 30 min suppressed CoCl<sub>2</sub> stimulated- COX-2/PGE<sub>2</sub> upregulation. Similar to the protective effect of H<sub>2</sub>S, inhibition of COX-2 by NS-398 attenuated not only CoCl<sub>2</sub>-induced cytotoxicity, but also the secretions of IL-6, IL-8 and IL-1 $\beta$  secretions. Our data revealed that COX-2/PGE<sub>2</sub> pathway mediates CoCl<sub>2</sub>-induced inflammation and cytotoxicity, and that inhibition of COX-2/PGE<sub>2</sub> pathway contributes to the protective effect of H<sub>2</sub>S. Similarly, Chi *et al.* reported that wogonin, which is derived from a traditional Chinese medicine Huang-Qin, reduces I/R-induced dermatic injury partly by inhibition of COX-2 [44]. In addition, in septic rat liver damage model, COX-2 inhibition by NS-398 can confer anti-inflammatory effects, increasing IL-10 secretion and decreasing IL-6 secretion [45]. Nevertheless, some research indicated that induction of COX-2/PGE<sub>2</sub> mediates atorvastatin-induced cardioprotection [46]. COX-2 induction also contributes to delayed cardioprotection induced by H<sub>2</sub>S preconditioning in isolated rat cardiomyocytes [47]. Taken together, the reason for anti-inflammatory or pro-inflammatory effect of COX-2 might be complicated. One explanation might be due to tissue-specific regulatory mechanisms. To elucidate this question, further studies are required.

NF- $\kappa$ B is an inducible transcription factor and can potentially augment COX-2 expression [48]. The p65 protein is one of the most abundant subunits of NF- $\kappa$ B. Its nuclear translocation usually indicates the activation of NF- $\kappa$ B. An earlier study showed that CoCl<sub>2</sub> promotes the translocation of NF- $\kappa$ B p65 subunit into nucleus and enhances its binding to a NF- $\kappa$ B consensus sequence in endothelial cells [49]. In accordance with the above report, we showed that exposure of HaCaT cells to CoCl<sub>2</sub> led to the accumulation of intranuclear NF- $\kappa$ B p65 subunit, which was significantly repressed by pretreatment with NaHS. By inhibiting NF- $\kappa$ B, both H<sub>2</sub>S and PDCT (a selective inhibitor of NF- $\kappa$ B) attenuated CoCl<sub>2</sub>-induced overexpression of COX-2, oversecretion of

inflammatory factors and cytotoxicity in HaCaT cells. These results are comparable with the previous findings that the H<sub>2</sub>S-releasing molecule, GYY4137, protects against lipopolysaccharide-induced endotoxic shock in the rat through inhibition of NF- $\kappa$ B upregulation [50]. Collectively, we provide new evidence that activation of NF- $\kappa$ B regulates COX-2-mediated inflammation and cytotoxicity, and that H<sub>2</sub>S protects against CoCl<sub>2</sub>-induced inflammation and cytotoxicity by inhibition of NF- $\kappa$ B/COX-2 pathway in HaCaT cells.

Numerous studies have demonstrated that ROS are important triggers to upregulate NF- $\kappa$ B activity and that antioxidants can be consequently applied to inhibit NF- $\kappa$ B activation [51,52]. Our more recent study showed that ROS mediate CoCl<sub>2</sub>-induced activation of NF- $\kappa$ B/COX-2 pathway [26]. To determine whether antioxidation of H<sub>2</sub>S was involved in its inhibition of NF- $\kappa$ B/COX-2 pathway, we observed the effect of NAC, a ROS scavenger, on CoCl<sub>2</sub>-induced overexpressions of NF- $\kappa$ B p65 subunit and COX-2. Similar to H<sub>2</sub>S-induced inhibition of overexpressions of NF- $\kappa$ B p65 subunit and COX-2, pretreatment with NAC also obviously suppressed CoCl<sub>2</sub>-induced accumulation of intranuclear NF- $\kappa$ B p65 subunit and overexpression of COX-2. Further study also revealed that NAC significantly alleviated CoCl<sub>2</sub>-induced secretions of IL-6, IL-8 and IL-1 $\beta$ . These data indicated that H<sub>2</sub>S represses NF- $\kappa$ B/COX-2-mediated inflammation partially by its antioxidative effect.

In summary, the present study has for the first time demonstrated that H<sub>2</sub>S confers a cytoprotective effect against chemical hypoxia-induced cytotoxicity and inflammation through inhibition of the ROS-activated NF- $\kappa$ B/COX-2 signaling pathway in HaCaT cells. Our study provides new insights into the roles of H<sub>2</sub>S in attenuating hypoxia-induced dermatic injury. Modulation of endogenous H<sub>2</sub>S or exogenous administration of H<sub>2</sub>S may be a novel therapeutic strategy for dermatic injury induced by hypoxia.

## Author Contributions

Conceived and designed the experiments: JF CY ZY. Performed the experiments: CY ZY. Analyzed the data: CY ZY. Contributed reagents/materials/analysis tools: MZ CW. Wrote the paper: JF CY ZY. Offered the data of IL-1 $\beta$  and revised the manuscript: QD. Detected the ROS content and GSH level: XW. Provided some data about secretions of inflammatory factor with ELISA: AL. Provided the HaCaT cell line and performed some experiments: FZ. Participated in designing the study: PC.

## References

- Calvert JW, Coetzee WA, Lefter DJ (2010) Novel insights into hydrogen sulfide-mediated cytoprotection. *Antioxid Redox Signal* 12: 1203–1217.
- Swaroop M, Bradley K, Ohura T, Tahara T, Roper MD, et al. (1992) Rat cystathionine beta-synthase. Gene organization and alternative splicing. *J Biol Chem* 267: 11455–11461.
- Pae HO, Lee YC, Jo EK, Chung HT (2009) Subtle interplay of endogenous bioactive gases (NO, CO and H<sub>2</sub>S) in inflammation. *Arch Pharm Res* 32: 1155–1162.
- Wallace JL (2010) Physiological and pathophysiological roles of hydrogen sulfide in the gastrointestinal tract. *Antioxid Redox Signal* 12: 1125–1133.
- Bian JS, Yong QC, Pan TT, Feng ZN, Ali MY, et al. (2006) Role of hydrogen sulfide in the cardioprotection caused by ischemic preconditioning in the rat heart and cardiac myocytes. *J Pharmacol Exp Ther* 316: 670–678.
- Fiorucci S, Antonelli E, Mencarelli A, Orlandi S, Renga B, et al. (2005) The third gas: H<sub>2</sub>S regulates perfusion pressure in both the isolated and perfused normal rat liver and in cirrhosis. *Hepatology* 42: 539–548.
- Tripata P, Patel NS, Brancaleone V, Renshaw D, Rocha J, et al. (2009) Characterisation of cystathionine gamma-lyase/hydrogen sulphide pathway in ischaemia/reperfusion injury of the mouse kidney: an in vivo study. *Eur J Pharmacol* 606: 205–209.
- Kimura Y, Kimura H (2004) Hydrogen sulfide protects neurons from oxidative stress. *FASEB J* 18: 1165–1167.
- Geng B, Chang L, Pan C, Qi Y, Zhao J, et al. (2004) Endogenous hydrogen sulfide regulation of myocardial injury induced by isoproterenol. *Biochem Biophys Res Commun* 318: 756–763.
- Whiteman M, Armstrong JS, Chu SH, Jia-Ling S, Wong BS, et al. (2004) The novel neuromodulator hydrogen sulfide: an endogenous peroxynitrite ‘scavenger’? *J Neurochem* 90: 765–768.
- Whiteman M, Li L, Rose P, Tan CH, Parkinson DB, et al. (2010) The effect of hydrogen sulfide donors on lipopolysaccharide-induced formation of inflammatory mediators in macrophages. *Antioxid Redox Signal* 12: 1147–1154.
- Zhang H, Mochhala SM, Bhatia M (2008) Endogenous hydrogen sulfide regulates inflammatory response by activating the ERK pathway in polymicrobial sepsis. *J Immunol* 181: 4320–4331.
- Hu LF, Wong PT, Moore PK, Bian JS (2007) Hydrogen sulfide attenuates lipopolysaccharide-induced inflammation by inhibition of p38 mitogen-activated protein kinase in microglia. *J Neurochem* 100: 1121–1128.
- Mustoe TA, O’Shaughnessy K, Kloeters O (2006) Chronic wound pathogenesis and current treatment strategies: a unifying hypothesis. *Plast Reconstr Surg* 117: 35S–41S.
- Barcelos LS, Duplax C, Krankel N, Graiani G, Invernici G, et al. (2009) Human CD133<sup>+</sup> progenitor cells promote the healing of diabetic ischemic ulcers by paracrine stimulation of angiogenesis and activation of Wnt signaling. *Circ Res* 104: 1095–1102.
- Bolajoko EB, Mossanda KS, Adeniyi F, Akinosun O, Fasanmade A, et al. (2008) Antioxidant and oxidative stress status in type 2 diabetes and diabetic foot ulcer. *S Afr Med J* 98: 614–617.
- Lazarides MK, Giannoukas AD (2007) The role of hemodynamic measurements in the management of venous and ischemic ulcers. *Int J Low Extrem Wounds* 6: 254–261.
- Gordillo GM, Sen CK (2003) Revisiting the essential role of oxygen in wound healing. *Am J Surg* 186: 259–263.
- Huber J, Reddy R, Pitham T, Huber D (2008) Increasing heel skin perfusion by elevation. *Adv Skin Wound Care* 21: 37–41.
- Tandara AA, Mustoe TA (2004) Oxygen in wound healing—more than a nutrient. *World J Surg* 28: 294–300.



21. Houwing R, Overgoor M, Kon M, Jansen G, van Asbeck BS, et al. (2000) Pressure-induced skin lesions in pigs: reperfusion injury and the effects of vitamin E. *J Wound Care* 9: 36–40.
22. Sener G, Sert G, Ozer Schirli A, Arbak S, Uslu B, et al. (2006) Pressure ulcer-induced oxidative organ injury is ameliorated by beta-glucan treatment in rats. *Int Immunopharmacol* 6: 724–732.
23. Lu M, Hu LF, Hu G, Bian JS (2008) Hydrogen sulfide protects astrocytes against H<sub>2</sub>O<sub>2</sub>-induced neural injury via enhancing glutamate uptake. *Free Radical Bio Med* 45: 1705–1713.
24. Abd-El-Azem SA, Ferguson MW, Appleton I, Bhowmick A, McCollum CN, et al. (2001) Expression of cyclooxygenase isoforms in normal human skin and chronic venous ulcers. *J Pathol* 195: 616–623.
25. Jeong HJ, Hong SH, Park RK, Shin T, An NH, et al. (2005) Hypoxia-induced IL-6 production is associated with activation of MAP kinase, HIF-1, and NF-kappaB on HEI-OC1 cells. *Hear Res* 207: 59–67.
26. Yang C, Ling H, Zhang M, Yang Z, Wang X, et al. (2011) Oxidative stress mediates chemical hypoxia-induced injury and inflammation by activating NF-kappaB-COX-2 pathway in HaCaT cells. *Mol Cells* 31: 531–538.
27. Zou W, Yan M, Xu W, Huo H, Sun L, et al. (2001) Cobalt chloride induces PC12 cells apoptosis through reactive oxygen species and accompanied by AP-1 activation. *J Neurosci Res* 64: 646–653.
28. Jung JY, Mo HC, Yang KH, Jeong YJ, Yoo HG, et al. (2007) Inhibition by epigallocatechin gallate of CoCl<sub>2</sub>-induced apoptosis in rat PC12 cells. *Life Sci* 80: 1355–1363.
29. Kim KS, Rajagopal V, Gonsalves C, Johnson C, Kalra VK (2006) A novel role of hypoxia-inducible factor in cobalt chloride- and hypoxia-mediated expression of IL-8 chemokine in human endothelial cells. *J Immunol* 177: 7211–7224.
30. Montopoli M, Froidi G, Comelli MC, Prosdocimi M, Caparrotta L (2007) Aescin protection of human vascular endothelial cells exposed to cobalt chloride mimicked hypoxia and inflammatory stimuli. *Planta Med* 73: 285–288.
31. Altenburger R, Kissel T (1999) The human keratinocyte cell line HaCaT: an in vitro cell culture model for keratinocyte testosterone metabolism. *Pharm Res* 16: 766–771.
32. Boukamp P, Petrussevska RT, Breitkreutz D, Hornung J, Markham A, et al. (1988) Normal keratinization in a spontaneously immortalized aneuploid human keratinocyte cell line. *J Cell Biol* 106: 761–771.
33. Floreani M, Petrone M, Debetto P, Palatini P (1997) A comparison between different methods for the determination of reduced and oxidized glutathione in mammalian tissues. *Free Radic Res* 26: 449–455.
34. Jha S, Calvert JW, Duranski MR, Ramachandran A, Lefer DJ (2008) Hydrogen sulfide attenuates hepatic ischemia-reperfusion injury: role of antioxidant and antiapoptotic signaling. *Am J Physiol Heart Circ Physiol* 295: H801–806.
35. Goldberg MA, Dunning SP, Bunn HF (1988) Regulation of the erythropoietin gene: evidence that the oxygen sensor is a heme protein. *Science* 242: 1412–1415.
36. Sharp FR, Beraud M (2004) HIF1 and oxygen sensing in the brain. *Nat Rev Neurosci* 5: 437–448.
37. Yuan Y, Hilliard G, Ferguson T, Millhorn DE (2003) Cobalt inhibits the interaction between hypoxia-inducible factor-alpha and von Hippel-Lindau protein by direct binding to hypoxia-inducible factor-alpha. *J Biol Chem* 278: 15911–15916.
38. Chen SL, Yang CT, Yang ZL, Guo RX, Meng JL, et al. (2010) Hydrogen sulphide protects H9c2 cells against chemical hypoxia-induced injury. *Clin Exp Pharmacol Physiol* 37: 316–321.
39. Meng JL, Mei WY, Dong YF, Wang JH, Zhao CM, et al. (2011) Heat shock protein 90 mediates cytoprotection of hydrogen sulfide against chemical hypoxia-induced injury in PC12 cells. *Clin Exp Pharmacol Physiol* 38: 42–49.
40. Henderson PW, Singh SP, Belkin D, Nagineni V, Weinstein AL, et al. (2010) Hydrogen sulfide protects against ischemia-reperfusion injury in an in vitro model of cutaneous tissue transplantation. *J Surg Res* 159: 451–455.
41. Gobbi G, Ricci F, Malinverno C, Carubbi C, Pambianco M, et al. (2009) Hydrogen sulfide impairs keratinocyte cell growth and adhesion inhibiting mitogen-activated protein kinase signaling. *Lab Invest* 89: 994–1006.
42. Kloesch B, Liszt M, Broell J (2010) H<sub>2</sub>S transiently blocks IL-6 expression in rheumatoid arthritic fibroblast-like synoviocytes and deactivates p44/42 mitogen-activated protein kinase. *Cell Biol Int* 34: 477–484.
43. Tsutakawa S, Kobayashi D, Kusama M, Moriya T, Nakahata N (2009) Nicotine enhances skin necrosis and expression of inflammatory mediators in a rat pressure ulcer model. *Br J Dermatol* 161: 1020–1027.
44. Chi YS, Kim HP (2005) Suppression of cyclooxygenase-2 expression of skin fibroblasts by wogonin, a plant flavone from *Scutellaria radix*. *Prostaglandins Leukot Essent Fatty Acids* 72: 59–66.
45. Li B, Li YM, Li X, Shi B, He MY, et al. (2009) COX-2 inhibition improves immune system homeostasis and decreases liver damage in septic rats. *J Surg Res* 157: 43–47.
46. Birnbaum Y, Ye Y, Rosanio S, Tavackoli S, Hu ZY, et al. (2005) Prostaglandins mediate the cardioprotective effects of atorvastatin against ischemia-reperfusion injury. *Cardiovasc Res* 65: 345–355.
47. Hu LF, Pan TT, Neo KL, Yong QC, Bian JS (2008) Cyclooxygenase-2 mediates the delayed cardioprotection induced by hydrogen sulfide preconditioning in isolated rat cardiomyocytes. *Pflugers Arch* 455: 971–978.
48. Kang YJ, Wingerd BA, Arakawa T, Smith WL (2006) Cyclooxygenase-2 gene transcription in a macrophage model of inflammation. *J Immunol* 177: 8111–8122.
49. Wagner M, Klein CL, Kleinert H, Euchenhofer C, Forstermann U, et al. (1997) Heavy metal ion induction of adhesion molecules and cytokines in human endothelial cells: the role of NF-kappaB, I kappaB-alpha and AP-1. *Pathobiology* 65: 241–252.
50. Li L, Salto-Tellez M, Tan CH, Whiteman M, Moore PK (2009) GYY4137, a novel hydrogen sulfide-releasing molecule, protects against endotoxin shock in the rat. *Free Radic Biol Med* 47: 103–113.
51. Huang CY, Fujimura M, Noshita N, Chang YY, Chan PH (2001) SOD1 down-regulates NF-kappaB and c-Myc expression in mice after transient focal cerebral ischemia. *J Cereb Blood Flow Metab* 21: 163–173.
52. Pieper GM, Olds C, Hilton G, Lindholm PF, Adams MB, et al. (2001) Antioxidant treatment inhibits activation of myocardial nuclear factor kappa B and inhibits nitrosylation of myocardial heme protein in cardiac transplant rejection. *Antioxid Redox Signal* 3: 81–88.
